# Supplementary material for: Changes in smoking behavior among victims after the great East Japan earthquake and tsunami
Source: Springer Nature journal article supplement (doi:10.1186/s12199-020-00858-5), 2020-06-11
Supplement: MOESM1 [file 18074132]

Table a. Proportion of nicotine dependence accessed by TSD, by area (disaster area in 2012, All Japan in 2013)

| age group           | Coastal area (Iwate and Miyagi;<br>n=1,043) |                       | Inland area (Iwate and<br>Miyagi; n=935) |                       | All Japan (n=1081)  |                       |
|---------------------|---------------------------------------------|-----------------------|------------------------------------------|-----------------------|---------------------|-----------------------|
|                     | male (n=455)<br>(%)                         | female (n=588)<br>(%) | male (n=407)<br>(%)                      | female (n=528)<br>(%) | male (n=493)<br>(%) | female (n=588)<br>(%) |
| 20 ~ 29             | 17.6                                        | 15.4                  | 16.7                                     | 10.2                  | 2.6                 | 10.9                  |
| 30 ~ 39             | 13.0                                        | 19.6                  | 27.8                                     | 8.9                   | 20.3                | 3.2                   |
| 40 ~ 49             | 26.0                                        | 17.3                  | 22.2                                     | 4.3                   | 18.7                | 4.6                   |
| 50 ~ 59             | 19.0                                        | 15.5                  | 15.9                                     | 1.0                   | 19.3                | 4.8                   |
| 60 ~ 69             | 21.6                                        | 5.0                   | 15.0                                     | 3.0                   | 11.0                | 3.3                   |
| 70 ~ 79             | 15.0                                        | 3.3                   | 6.8                                      | 1.1                   | 4.8                 | 1.3                   |
| 80 and over         | 7.5                                         | 0.0                   | 3.7                                      | 0.0                   | 4.2                 | 5.6                   |
| crude rate          | 7.5                                         | 2.4                   | 3.9                                      | 0.6                   | 2.6                 | 0.3                   |
| adjusted rate       | 18.3                                        | 11.2                  | 17.1                                     | 4.1                   | 12.9                | 4.6                   |
|                     | 95% CI (17.8 - 18.7)                        | (10.9 - 11.5)         | (16.7 - 17.6)                            | (3.9 - 4.3)           | (12.6 - 13.3)       | (4.4 - 4.8)           |
| testing (vs Japan)  | p<0.01                                      | p<0.01                | p=0.17                                   | p=0.84                |                     |                       |
| testing (vs Inland) | p=0.13                                      | p<0.01                |                                          |                       |                     |                       |

Adjusted rate was calculated by using 2012 national population. CI: confidence interval  
Nicotine dependence status was assessed by TDS (5 points and over).

Table b. Change of nicotine dependence status accessed by TSD from 2012 to 2014 (Panel survey in disaster areas)

|                                     | Coastal area (Iwate and Miyagi; n=556) |        |                |        | Inland area (Iwate and Miyagi; n=348) |      |                |      |
|-------------------------------------|----------------------------------------|--------|----------------|--------|---------------------------------------|------|----------------|------|
|                                     | male (n=223)                           |        | female (n=333) |        | male (n=157)                          |      | female (n=191) |      |
|                                     | number                                 | %      | number         | %      | number                                | %    | number         | %    |
| Dpend → Depend                      | 23                                     | 10.3   | 13             | 3.9    | 16                                    | 10.2 | 5              | 2.6  |
| No depend → No depend               | 170                                    | 76.2   | 296            | 88.9   | 125                                   | 79.6 | 180            | 94.2 |
| Improvement<br>testing (vs inland)  | 16                                     | 7.2    | 13             | 3.9    | 11                                    | 7.0  | 1              | 0.5  |
|                                     |                                        | p=0.36 |                | p<0.01 |                                       |      |                |      |
| Exacerbation<br>testing (vs inland) | 14                                     | 6.3    | 11             | 3.3    | 5                                     | 3.2  | 5              | 2.6  |
|                                     |                                        | p=0.04 |                | p=0.15 |                                       |      |                |      |

Depend; dependence: TDS; Tobacco Dependence Scale

Table c. Factors associated with nicotine dependence assessed by FTND score

| dependent variable<br>covariates | smokers in 2012 |               | smokers in 2014 |               | smokers in 2014 |               | deterioration of smoking status in 2014 |               |
|----------------------------------|-----------------|---------------|-----------------|---------------|-----------------|---------------|-----------------------------------------|---------------|
|                                  | factors in 2012 |               | factors in 2014 |               | factors in 2012 |               | factors in 2012                         |               |
|                                  | Odds ratio      | 95% CI        | Odds ratio      | 95% CI        | Odds ratio      | 95% CI        | Odds ratio                              | 95% CI        |
| costal area                      | 3.03            | (2.29–4.02) * | 2.05            | (1.32–3.17)   | 2.05            | (1.32–3.17)   | 0.95                                    | (0.48–1.88)   |
| divorced                         | 4.20            | (2.82–6.27)   | 4.90            | (2.86–8.40) * | 5.06            | (2.88–8.89) * | 2.25                                    | (0.86–5.93)   |
| widowed                          | 0.78            | (0.45–1.36)   | 1.28            | (0.60–2.74)   | 1.47            | (0.70–3.09)   | 3.19                                    | (1.09–9.39) * |
| single                           | 0.90            | (0.67–1.42)   | 0.66            | (0.34–1.27)   | 0.97            | (0.54–1.74)   | 0.31                                    | (0.09–1.13)   |
| years of education ≤9            | 1.40            | (1.01–1.95)   | 1.62            | (1.00–2.60) * | 2.28            | (1.41–3.69)   | 2.09                                    | (0.94–4.66)   |
| non-permanent job                | 1.39            | (0.99–1.95)   | 0.87            | (0.50–1.52)   | 0.98            | (0.55–1.74)   | 0.54                                    | (0.16–1.85)   |
| unemployment                     | 1.50            | (0.94–2.38)   | 0.85            | (0.37–1.93)   | 1.31            | (0.70–2.46)   | 2.17                                    | (0.85–5.51)   |
| annual income ≤2 million yen     | 1.26            | (0.96–1.66)   | 1.33            | (0.86–2.07)   | 1.55            | (1.02–2.36) * | 1.26                                    | (0.64–2.54)   |
| complete destruction of house    | 2.08            | (1.59–2.71) * | 0.56            | (0.36–0.85) * | 1.55            | (1.03–2.33) * | 1.03                                    | (0.52–2.03)   |
| temporary housing                | 3.17            | (2.39–4.20) * | 1.75            | (1.15–2.64) * | 2.08            | (1.34–3.21)   | 0.97                                    | (0.49–1.91)   |
| loss of family members           | 1.28            | (0.97–1.69)   |                 |               | 0.87            | (0.57–1.32)   | 0.64                                    | (0.29–1.39)   |
| agriculture, forestry, fishery   | 0.82            | (0.43–1.56)   | 0.90            | (0.38–2.11)   | 0.80            | (0.32–2.00)   | 0.42                                    | (0.06–3.17)   |
| AUDIT 8 points and over          | 2.40            | (1.73–3.34)   | 1.59            | (0.92–2.73)   | 1.40            | (0.83–2.36)   | 1.11                                    | (0.46–2.70)   |
| AUDIT 12 points and over         | 2.13            | (1.35–3.36)   | 1.52            | (0.74–3.11)   | 0.95            | (0.44–2.07)   | 1.09                                    | (0.31–3.78)   |
| AUDIT 15 points and over         | 3.84            | (2.07–7.13)   | 0.94            | (0.33–2.73)   | 2.10            | (0.76–5.79)   | 1.83                                    | (0.40–8.42)   |

Results of multiple logistic regression analysis, dependent variable; moderate or severe nicotine dependence

\*: statistically significant associated factors with good model fitness assessed by Hosmer-Lemeshow test

All covariates were adjusted by sex and age.

Table d. Factors associated with nicotine dependence assessed by TDS score

| dependent variable<br>covariates | smokers in 2012 |               | smokers in 2014 |               | smokers in 2014 |               | deterioration of smoking status in 2014 |             |
|----------------------------------|-----------------|---------------|-----------------|---------------|-----------------|---------------|-----------------------------------------|-------------|
|                                  | factors in 2012 |               | factors in 2014 |               | factors in 2012 |               | factors in 2012                         |             |
|                                  | Odds ratio      | 95% CI        | Odds ratio      | 95% CI        | Odds ratio      | 95% CI        | Odds ratio                              | 95% CI      |
| costal area                      | 1.84            | (1.36–2.50)   | 1.54            | (0.96–2.47)   | 1.54            | (0.96–2.47)   | 1.83                                    | (0.86–3.91) |
| divorced                         | 3.91            | (2.56–5.98) * | 2.88            | (1.60–5.20) * | 3.93            | (2.16–7.17) * | 1.87                                    | (0.73–4.79) |
| widowed                          | 0.60            | (0.30–1.19)   | 0.49            | (0.16–1.44)   | 0.53            | (0.18–1.56)   | 0.22                                    | (0.03–1.75) |
| single                           | 0.86            | (0.56–1.33)   | 0.89            | (0.45–1.74)   | 1.03            | (0.54–1.95)   | 0.69                                    | (0.24–1.97) |
| years of education ≤9            | 1.17            | (0.80–1.73)   | 1.02            | (0.58–1.80)   | 1.47            | (0.85–2.56)   | 0.99                                    | (0.41–2.38) |
| non-permanent job                | 1.63            | (1.13–2.35) * | 0.81            | (0.43–1.52)   | 1.18            | (0.64–2.18)   | 1.34                                    | (0.55–3.28) |
| unemployment                     | 0.86            | (0.46–1.61)   | 1.45            | (0.66–3.20)   | 1.18            | (0.56–2.49)   | 1.35                                    | (0.46–3.98) |
| annual income ≤2 million yen     | 1.06            | (0.78–1.45)   | 1.18            | (0.72–1.95)   | 1.09            | (0.68–1.74)   | 1.20                                    | (0.58–2.45) |
| complete destruction of house    | 1.49            | (1.10–2.00) * | 0.64            | (0.40–1.03)   | 1.36            | (0.86–2.15)   | 1.46                                    | (0.72–2.98) |
| temporary housing                | 1.93            | (1.42–2.62)   | 1.33            | (0.84–2.09)   | 1.56            | (0.98–2.51)   | 1.87                                    | (0.88–3.97) |
| loss of family members           | 1.42            | (1.04–1.95)   | —               |               | 1.04            | (0.65–1.67)   | 1.33                                    | (0.66–2.69) |
| agriculture, forestry, fishery   | 0.59            | (0.25–1.38)   | 0.49            | (0.15–1.65)   | 0.17            | (0.02–1.26)   | —                                       |             |
| AUDIT 8 points and over          | 2.21            | (1.53–3.19)   | 1.54            | (0.84–2.83)   | 1.46            | (0.81–2.62)   | 1.33                                    | (0.51–3.47) |
| AUDIT 12 points and over         | 2.48            | (1.53–4.05) * | 2.03            | (0.95–4.30)   | 1.38            | (0.61–3.14)   | 0.98                                    | (0.22–4.33) |
| AUDIT 15 points and over         | 4.07            | (2.17–7.63) * | 2.09            | (0.77–5.69)   | 2.28            | (0.79–6.61)   | —                                       |             |

Results of multiple logistic regression analysis, dependent variable; nicotine dependence

\*: statistically significant associated factors with good model fitness assessed by Hosmer-Lemeshow test

All covariates were adjusted by sex and age.
